# Supplementary material for: Osteoclast-mediated resorption primes the skeleton for successful integration during axolotl limb regeneration
Source: eLife. 2022 Oct 11;11:e79966. doi: 10.7554/eLife.79966 (PMC9581535; doi:10.7554/eLife.79966)
Supplement: Figure 4—source data 1. [file elife-79966-fig4-data1.csv]

Score matrix for integration phenotypes
Radius
Sample	Angulation	Superposition	Heterotopic	Continuity	Total
u1	0	0	0	0	0
u2	1	0	0	0	1
u3	1	0	0	0	1
u4	1	1	0	1	3
u5	1	1	0	1	3
u6	0	0	0	0	0
v1	1	1	0	1	3
v2	1	1	0	1	3
v3	1	1	0	1	2
v4	1	0	0	1	2
v5	1	0	0	1	2
v6	1	1	0	1	3
z1	1	1	1	1	4
z2	1	1	0	1	3
z3	1	1	0	1	3
z4	1	1	0	1	3
z5	1	1	1	1	4
z6	1	1	0	1	3
Ulna
Sample	Angulation	Superposition	Heterotopic	Continuity	Total
u1	0	0	0	0	0
u2	0	0	0	0	0
u3	0	0	0	0	0
u4	1	0	0	1	2
u5	1	0	0	0	1
u6	0	0	0	0	0
v1	1	1	0	1	3
v2	0	0	0	0	0
v3	1	0	0	0	1
v4	0	0	0	0	0
v5	1	0	0	0	1
v6	1	0	0	1	2
z1	1	1	0	1	3
z2	0	1	0	0	1
z3	1	1	0	1	3
z4	1	1	0	1	3
z5	0	1	1	1	3
z6	1	1	0	1	3
